# Supplementary material for: Application of COI Primers 30F/885R in Rotifers to Regional Species Diversity in (Sub)Tropical China
Source: MDPI journal article supplement (doi:10.3390/d13080390), 2021-08-19
Supplement: s1 [file s1]

**Table S1.** The abundances of rotifers in the quantitative samples collected 23 reservoirs (in unit of individuals/L).

|                                   | GS  | PX | FH | FX | DF<br>H | SB | GT | YQ | YT | MX       | W<br>G | FS | QL<br>S | QX | MH<br>T | HS  | CT | HT | DB | SH<br>B | DS | HZ<br>P | HS<br>Y |
|-----------------------------------|-----|----|----|----|---------|----|----|----|----|----------|--------|----|---------|----|---------|-----|----|----|----|---------|----|---------|---------|
| <i>Keratella tropica</i>          | 2   | 0  | 1  | 0  | 441     | 1  | 0  | 2  | 0  | 15       | 0      | 0  | 0       | 0  | 2       | 71  | 1  | 0  | 0  | 1       | 1  | 0       | 3       |
| <i>Keratella tecta</i>            | 330 | 1  | 14 | 2  | 36      | 8  | 6  | 49 | 6  | 159<br>9 | 97     | 7  | 5       | 3  | 6       | 328 | 1  | 25 | 4  | 1       | 28 | 0       | 125     |
| <i>Keratella cochlearis</i>       | 2   | 9  | 32 | 34 | 0       | 0  | 57 | 5  | 99 | 192      | 70     | 32 | 4       | 10 | 5       | 37  | 27 | 50 | 1  | 58      | 6  | 52      | 0       |
| <i>Trichocerca similis</i>        | 24  | 1  | 10 | 0  | 186     | 0  | 1  | 2  | 4  | 57       | 50     | 0  | 0       | 0  | 3       | 22  | 1  | 19 | 1  | 4       | 5  | 0       | 0       |
| <i>Trichocerca capucina</i>       | 0   | 0  | 1  | 1  | 21      | 0  | 0  | 0  | 3  | 3        | 4      | 0  | 0       | 0  | 0       | 1   | 0  | 0  | 0  | 0       | 1  | 0       | 0       |
| <i>Trichocerca cylindrica</i>     | 2   | 2  | 2  | 0  | 105     | 0  | 2  | 0  | 0  | 9        | 1      | 2  | 4       | 0  | 0       | 0   | 0  | 1  | 0  | 0       | 0  | 1       | 2       |
| <i>Trichocerca pusilla</i>        | 0   | 0  | 2  | 0  | 24      | 0  | 0  | 1  | 0  | 9        | 0      | 0  | 0       | 0  | 0       | 5   | 1  | 3  | 1  | 0       | 0  | 0       | 0       |
| <i>Trichocerca rousseleti</i>     | 1   | 0  | 0  | 0  | 0       | 0  | 0  | 0  | 0  | 0        | 0      | 0  | 0       | 0  | 0       | 0   | 0  | 0  | 0  | 0       | 0  | 0       | 0       |
| <i>Trichocerca dixon-nuttalli</i> | 0   | 0  | 4  | 0  | 0       | 0  | 4  | 0  | 1  | 0        | 1      | 0  | 0       | 1  | 0       | 0   | 0  | 0  | 0  | 0       | 0  | 0       | 2       |
| <i>Trichocerca longisetata</i>    | 10  | 0  | 0  | 0  | 0       | 0  | 0  | 0  | 0  | 0        | 0      | 0  | 0       | 0  | 0       | 0   | 0  | 0  | 0  | 0       | 0  | 0       | 0       |
| <i>Trichocerca rattus rattus</i>  | 0   | 0  | 10 | 0  | 0       | 0  | 0  | 0  | 0  | 0        | 10     | 0  | 0       | 0  | 0       | 2   | 0  | 0  | 0  | 0       | 0  | 0       | 0       |
| <i>Trichocerca gracilis</i>       | 0   | 0  | 0  | 0  | 0       | 0  | 0  | 0  | 0  | 0        | 2      | 0  | 0       | 1  | 0       | 3   | 0  | 0  | 0  | 0       | 0  | 0       | 1       |
| <i>Trichocerca vargai</i>         | 0   | 0  | 0  | 0  | 0       | 0  | 0  | 0  | 0  | 0        | 0      | 0  | 0       | 0  | 0       | 0   | 0  | 0  | 0  | 0       | 0  | 0       | 0       |
| <i>Brachionus angularis</i>       | 1   | 0  | 0  | 0  | 0       | 1  | 0  | 1  | 0  | 0        | 0      | 0  | 0       | 0  | 0       | 2   | 0  | 0  | 0  | 0       | 0  | 0       | 0       |
| <i>Brachionus caudatus</i>        | 0   | 0  | 0  | 0  | 0       | 0  | 0  | 0  | 0  | 0        | 0      | 0  | 0       | 0  | 0       | 1   | 0  | 0  | 0  | 0       | 0  | 0       | 0       |
| <i>Brachionus forficula</i>       | 0   | 0  | 0  | 0  | 0       | 0  | 0  | 0  | 0  | 0        | 0      | 0  | 0       | 0  | 0       | 7   | 0  | 0  | 0  | 0       | 0  | 0       | 1       |
| <i>Brachionus diversicornis</i>   | 0   | 0  | 0  | 0  | 3       | 1  | 0  | 0  | 0  | 0        | 1      | 0  | 0       | 3  | 0       | 0   | 0  | 0  | 0  | 0       | 0  | 0       | 0       |
| <i>Brachionus calyciflorus</i>    | 0   | 0  | 0  | 0  | 0       | 0  | 0  | 0  | 0  | 0        | 0      | 0  | 0       | 0  | 0       | 0   | 0  | 0  | 0  | 0       | 0  | 0       | 0       |
| <i>Brachionus quadridentatus</i>  | 0   | 0  | 0  | 0  | 0       | 0  | 0  | 0  | 0  | 0        | 0      | 0  | 0       | 0  | 0       | 0   | 0  | 0  | 0  | 0       | 0  | 0       | 0       |
| <i>Synchaeta stylata</i>          | 1   | 0  | 82 | 0  | 3       | 4  | 0  | 0  | 0  | 6        | 27     | 0  | 0       | 17 | 2       | 0   | 6  | 2  | 9  | 85      | 56 | 0       | 1       |
| <i>Hexarthra mira</i>             | 0   | 0  | 0  | 0  | 0       | 0  | 2  | 1  | 0  | 0        | 0      | 0  | 0       | 0  | 0       | 0   | 1  | 0  | 0  | 0       | 0  | 0       | 0       |
| <i>Lecane lunaris crenata</i>     | 0   | 0  | 0  | 0  | 0       | 0  | 0  | 0  | 0  | 0        | 0      | 0  | 0       | 0  | 0       | 0   | 0  | 0  | 0  | 0       | 0  | 0       | 0       |
| <i>Lecane flexilis</i>            | 0   | 0  | 0  | 0  | 0       | 0  | 0  | 0  | 0  | 0        | 0      | 0  | 0       | 0  | 0       | 0   | 0  | 0  | 0  | 0       | 0  | 0       | 0       |
| <i>Lecane galeata</i>             | 0   | 0  | 0  | 0  | 0       | 0  | 0  | 0  | 0  | 0        | 0      | 0  | 0       | 0  | 0       | 0   | 0  | 0  | 0  | 0       | 0  | 0       | 0       |
| <i>Lecane pyriformis</i>          | 0   | 0  | 1  | 0  | 0       | 0  | 0  | 0  | 0  | 0        | 0      | 0  | 0       | 0  | 0       | 0   | 0  | 0  | 0  | 0       | 0  | 0       | 0       |
| <i>Lecane arcuata</i>             | 0   | 0  | 0  | 0  | 0       | 0  | 0  | 0  | 0  | 0        | 0      | 0  | 0       | 0  | 0       | 0   | 0  | 0  | 0  | 0       | 0  | 0       | 0       |
| <i>Lecane thailandensis</i>       | 0   | 0  | 0  | 0  | 0       | 0  | 0  | 0  | 0  | 0        | 0      | 0  | 0       | 0  | 0       | 0   | 0  | 0  | 0  | 0       | 0  | 0       | 0       |
| <i>Conochilus unicornis</i>       | 1   | 0  | 9  | 0  | 0       | 0  | 1  | 0  | 3  | 0        | 0      | 0  | 0       | 1  | 0       | 0   | 0  | 0  | 0  | 0       | 0  | 0       | 0       |
| <i>Conochiloides dossuarius</i>   | 9   | 0  | 0  | 0  | 6       | 1  | 4  | 0  | 0  | 0        | 2      | 0  | 0       | 0  | 0       | 0   | 4  | 2  | 0  | 9       | 0  | 1       | 9       |
| <i>Asplanchna priodonta</i>       | 0   | 0  | 16 | 0  | 1       | 2  | 0  | 0  | 0  | 0        | 4      | 0  | 0       | 0  | 0       | 13  | 1  | 2  | 0  | 0       | 0  | 0       | 0       |
| <i>Filinia opoliensis</i>         | 1   | 0  | 1  | 0  | 0       | 0  | 0  | 7  | 0  | 0        | 0      | 0  | 0       | 0  | 0       | 0   | 0  | 0  | 0  | 0       | 0  | 0       | 0       |
| <i>Filinia saltator</i>           | 0   | 0  | 0  | 0  | 0       | 1  | 0  | 0  | 0  | 0        | 0      | 0  | 0       | 0  | 0       | 4   | 0  | 0  | 0  | 0       | 0  | 0       | 0       |
| <i>Filinia camasecla</i>          | 0   | 0  | 0  | 0  | 0       | 0  | 0  | 0  | 0  | 0        | 0      | 0  | 0       | 0  | 0       | 0   | 0  | 0  | 0  | 0       | 0  | 0       | 0       |
| <i>Filinia terminalis</i>         | 4   | 0  | 0  | 0  | 0       | 0  | 0  | 2  | 0  | 0        | 0      | 0  | 0       | 0  | 0       | 0   | 0  | 0  | 0  | 0       | 0  | 0       | 0       |
| <i>Pompholyx sulcata</i>          | 42  | 0  | 0  | 0  | 0       | 0  | 0  | 0  | 0  | 0        | 0      | 0  | 0       | 0  | 0       | 21  | 2  | 1  | 0  | 0       | 0  | 0       | 0       |
| <i>Anuraeopsis fissa</i>          | 74  | 0  | 11 | 0  | 25      | 5  | 2  | 16 | 6  | 15       | 1      | 1  | 18      | 1  | 4       | 0   | 0  | 32 | 1  | 0       | 2  | 0       | 19      |
| <i>Anuraeopsis coelata</i>        | 0   | 0  | 0  | 0  | 0       | 0  | 0  | 0  | 0  | 0        | 0      | 0  | 1       | 0  | 0       | 101 | 0  | 0  | 0  | 0       | 0  | 0       | 0       |
| <i>Polyarthra vulgaris</i>        | 4   | 0  | 23 | 1  | 11      | 0  | 2  | 0  | 0  | 12       | 29     | 0  | 1       | 2  | 2       | 11  | 1  | 0  | 0  | 6       | 0  | 4       | 6       |
| <i>Polyarthra dolichoptera</i>    | 10  | 0  | 69 | 0  | 10      | 0  | 1  | 0  | 1  | 21       | 29     | 0  | 2       | 0  | 1       | 71  | 2  | 42 | 0  | 7       | 0  | 0       | 92      |
| <i>Polyarthra major</i>           | 0   | 0  | 1  | 3  | 0       | 0  | 0  | 0  | 1  | 0        | 0      | 0  | 0       | 0  | 0       | 0   | 0  | 0  | 0  | 0       | 0  | 0       | 0       |
| <i>Ploesoma hudsoni</i>           | 0   | 0  | 0  | 0  | 1       | 0  | 0  | 0  | 0  | 0        | 0      | 0  | 0       | 0  | 0       | 0   | 0  | 0  | 0  | 0       | 0  | 0       | 0       |
| <i>Ascomorpha ovalis</i>          | 1   | 0  | 2  | 0  | 0       | 0  | 0  | 0  | 0  | 0        | 6      | 5  | 0       | 0  | 0       | 3   | 0  | 2  | 0  | 0       | 0  | 0       | 0       |
| <i>Ascomorpha saltans</i>         | 0   | 0  | 0  | 0  | 2       | 0  | 0  | 0  | 0  | 0        | 2      | 0  | 0       | 1  | 0       | 0   | 0  | 0  | 0  | 0       | 0  | 1       | 0       |

|                                     |   |   |   |   |   |   |   |   |   |   |    |   |   |   |   |   |   |   |   |   |   |   |
|-------------------------------------|---|---|---|---|---|---|---|---|---|---|----|---|---|---|---|---|---|---|---|---|---|---|
| <i>Trichotria tetractis similis</i> | 0 | 0 | 0 | 0 | 0 | 0 | 0 | 0 | 0 | 0 | 0  | 0 | 0 | 0 | 0 | 0 | 0 | 0 | 0 | 0 | 0 | 0 |
| <i>Gastropus stylifer</i>           | 0 | 0 | 0 | 0 | 0 | 0 | 0 | 0 | 0 | 0 | 0  | 0 | 0 | 0 | 0 | 0 | 0 | 0 | 0 | 0 | 3 | 0 |
| <i>Collotheca</i> sp.               | 1 | 0 | 0 | 0 | 0 | 0 | 0 | 0 | 1 | 0 | 16 | 0 | 1 | 0 | 0 | 2 | 0 | 2 | 0 | 0 | 0 | 0 |
| <i>Bdelloidea</i> sp.               | 3 | 0 | 0 | 0 | 0 | 1 | 0 | 0 | 0 | 0 | 0  | 0 | 0 | 0 | 0 | 1 | 0 | 0 | 0 | 0 | 0 | 6 |

**Table S2.** Information of 23 investigated reservoirs in the Hanjiang River Basin.

| Reservoir     | abbreviation | Lon E   | Lat N  | Total capacity<br>( $\times 10^8$ m <sup>3</sup> ) | The catchment<br>area (km <sup>2</sup> ) |
|---------------|--------------|---------|--------|----------------------------------------------------|------------------------------------------|
| Gangshan      | GS           | 116.7°  | 23.66° | 0.46                                               | 88                                       |
| Pingxi        | PX           | 116.78° | 23.82° | 0.11                                               | 11.6                                     |
| Fenghuang     | FH           | 116.67° | 23.89° | 0.60                                               | 164                                      |
| Fengxi        | FX           | 116.7°  | 23.95° | 0.33                                               | 45.7                                     |
| Dongfanghong  | DFH          | 115.7°  | 23.89° | 0.13                                               | 28.6                                     |
| Shibi         | SB           | 115.75° | 24.26° | 0.10                                               | 102                                      |
| Guitian       | GT           | 115.84° | 23.83° | 0.13                                               | 27.3                                     |
| Yanqian       | YQ           | 115.9°  | 23.9°  | 0.19                                               | 37.1                                     |
| Yitang        | YT           | 115.63° | 23.95° | 1.65                                               | 251                                      |
| Meixi         | MX           | 115.94° | 24.38° | 0.51                                               | 250                                      |
| Wengong       | WG           | 115.73° | 24.45° | 0.22                                               | 1603                                     |
| Fushi         | FS           | 115.81° | 24.56° | 0.24                                               | 53                                       |
| Qingliangshan | QLS          | 116.24° | 24.22° | 0.49                                               | 94.1                                     |
| Qingxi        | QX           | 116.63° | 24.58° | 0.80                                               | 1603                                     |
| Mianhuatan    | MHT          | 116.57° | 24.68° | 20.35                                              | 7907                                     |
| Heshui        | HS           | 115.7°  | 24.26° | 1.16                                               | 600                                      |
| Changtan      | CT           | 116.13° | 24.72° | 1.72                                               | 1990                                     |
| Huangtian     | HT           | 115.89° | 24.71° | 0.54                                               | 140                                      |
| Duobao        | DB           | 116.37° | 24.86° | 0.22                                               | 68                                       |
| Sanheba       | SHB          | 116.59° | 24.41° | 0.22                                               | 1603                                     |
| Dongshan      | DS           | 116.49° | 23.98° | 2.50                                               | 27503                                    |
| Huangzhuping  | HZP          | 116.24° | 24.73° | 0.12                                               | 18.2                                     |
| Heshanyan     | HSY          | 115.8°  | 24.19° | 0.13                                               | 27.3                                     |

**Table S3.** Morphological identification of rotifers from both quantitative and qualitative samples in the 23 investigated reservoirs and species identified with COI sequencing.

| Family        | Genera             | Species                             | Morphology | DNA Barcoding |
|---------------|--------------------|-------------------------------------|------------|---------------|
| Branchionidae | <i>Keratella</i>   | <i>Keratella tropica</i>            | +++        | √             |
|               |                    | <i>K. tecta</i>                     | +++        | √             |
|               |                    | <i>K. cochlearis</i>                | +++        | √             |
|               | <i>Brachionus</i>  | <i>Brachionus angularis</i>         | ++         | √             |
|               |                    | <i>B. caudatus</i>                  | ++         | √             |
|               |                    | <i>B. falcatus</i>                  |            | ×             |
|               |                    | <i>B. forficula</i>                 | ++         | √             |
|               |                    | <i>B. diversicornis</i>             | ++         | √             |
|               |                    | <i>B. calyciflorus</i>              | ++         | √             |
|               |                    | <i>B. quadridentatus</i>            | +          | √             |
|               |                    | <i>B. urceolaris</i>                |            | √             |
|               |                    | <i>B. leydigi</i>                   |            | √             |
|               |                    | <i>B. budapestinensis</i>           |            | √             |
|               | <i>Anuraeopsis</i> | <i>Anuraeopsis fissa</i>            | +++        | ×             |
|               |                    | <i>A. coelata</i>                   | +          |               |
|               | <i>Plationus</i>   | <i>Plationus patulus</i>            |            | √             |
| Trichotriidae | <i>Trichotria</i>  | <i>Trichotria tetractis similis</i> | +          | √             |
|               |                    | <i>T. pocillum</i>                  |            | √             |

|                 |                      |                                  |     |    |
|-----------------|----------------------|----------------------------------|-----|----|
| Lecanidae       | <i>Lecane</i>        | <i>Lecane lunaris crenata</i>    | +   |    |
|                 |                      | <i>L. flexilis</i>               | +   |    |
|                 |                      | <i>L. galeata</i>                | +   |    |
|                 |                      | <i>L. pyriformis</i>             | +   |    |
|                 |                      | <i>L. arcuata</i>                | +   |    |
|                 |                      | <i>L. thailandensis</i>          | +   |    |
|                 |                      | <i>L. bulla</i>                  |     | √  |
| Asplanchnidae   | <i>Asplanchna</i>    | <i>Asplanchna priodonta</i>      | ++  | √  |
|                 |                      | <i>A. girodi</i>                 |     | ×  |
|                 |                      | <i>A. brightwelli</i>            |     | √  |
| Gastropodidae   | <i>Ascomorpha</i>    | <i>Ascomorpha ovalis</i>         | ++  | √  |
|                 |                      | <i>A. ecaudis</i>                |     | ×  |
|                 |                      | <i>A. saltans</i>                | ++  |    |
|                 | <i>Gastropus</i>     | <i>Gastropus stylifer</i>        | +   |    |
| Trichocercidae  | <i>Trichocerca</i>   | <i>Trichocerca similis</i>       | +++ | √  |
|                 |                      | <i>T. capucina</i>               | ++  | √  |
|                 |                      | <i>T. cylindrica</i>             | ++  | √  |
|                 |                      | <i>T. pusilla</i>                | ++  | ×  |
|                 |                      | <i>T. rousseleti</i>             | ++  | ×  |
|                 |                      | <i>T. dixonnuttalli</i>          | ++  | √  |
|                 |                      | <i>T. longiseta</i>              | +   | ×  |
|                 |                      | <i>T. bidens</i>                 |     | ×  |
|                 |                      | <i>T. rattus rattus</i>          | ++  |    |
|                 |                      | <i>T. gracilis</i>               | ++  |    |
|                 |                      | <i>T. vargai</i>                 | +   |    |
| Synchaetidae    | <i>Synchaeta</i>     | <i>Synchaeta stylata</i>         | +++ | √  |
|                 |                      | <i>S. oblonga</i>                |     | √  |
|                 | <i>Polyarthra</i>    | <i>Polyarthra vulgaris</i>       | ++  | √  |
|                 |                      | <i>P. dolichoptera</i>           | +++ | √  |
|                 |                      | <i>P. major</i>                  | ++  |    |
|                 | <i>Ploesoma</i>      | <i>Ploesoma hudsoni</i>          | ++  | √  |
|                 | <i>P. truncatum</i>  |                                  | √   |    |
| Conochilidae    | <i>Conochilus</i>    | <i>Conochilus unicornis</i>      | ++  | ×  |
|                 |                      | <i>C. hippocrepis</i>            |     | ×  |
|                 | <i>Conochiloides</i> | <i>Conochiloides dossuarius</i>  | ++  |    |
| Testudinellidae | <i>Pompholyx</i>     | <i>Pompholyx sulcata</i>         | ++  | √  |
|                 | <i>Testudinella</i>  | <i>Testudinella patina</i>       |     | ×  |
| Filiniidae      | <i>Filinia</i>       | <i>Filinia opoliensis</i>        | ++  | √  |
|                 |                      | <i>F. saltator</i>               | +   |    |
|                 |                      | <i>F. camasecla</i>              | ++  |    |
|                 |                      | <i>F. terminalis</i>             | +   |    |
|                 |                      | <i>F. longiseta</i>              |     | ×  |
|                 |                      | <i>F. camasecla cambodgensis</i> |     | √  |
| Hexarthridae    | <i>Hexarthra</i>     | <i>Hexarthra mira</i>            | ++  | √  |
| Collothecidae   | <i>Collotheca</i>    | <i>Collotheca sp.</i>            | ++  |    |
| Philodinidae    | <i>Philodina</i>     | <i>Philodina sp.</i>             | ++  |    |
| Total           |                      | 64                               | 47  | 45 |

Note: "+" denotes a rare species, "++" denotes a common species, "+++" denotes a dominant species, "√" denotes the species with successful COI sequencing, "×" denotes the species with failed amplification or sequencing.

**Table S4.** Amplification of COI sequences in 45 rotifer species collected from 23 reservoirs.

|                             | G<br>S | PX | FH | FX | DF<br>H | SB | G<br>T | Y<br>Q | YTMX | W<br>G | FS | QL<br>S | Q<br>X | MH<br>T | H<br>S | CT | H<br>T | D<br>B | SH<br>B | D<br>S | HZ<br>P | HS<br>Y | PCR<br>success<br>rate(%) |
|-----------------------------|--------|----|----|----|---------|----|--------|--------|------|--------|----|---------|--------|---------|--------|----|--------|--------|---------|--------|---------|---------|---------------------------|
| <i>Keratella cochlearis</i> | √      | √  | √  |    | √       |    | √      |        | √3   | √2     | √  | √       | √      | √       | √2     | √  | √2     | √      | •       | √      | √       | •       | 71                        |

[illegible]

Note: “√” indicates that the sample was successfully sequenced after one amplifications, “√<sub>2</sub>” indicates that the sample was successfully sequenced after two amplifications, “√<sub>3</sub>” indicates that the sample was successfully sequenced after three amplifications, “x” denotes an amplification failure samples, “●” denotes a successful amplification but sequencing failure samples, “x●” denotes an amplification failed, again pick sample amplification is successful, while sequencing failed samples.

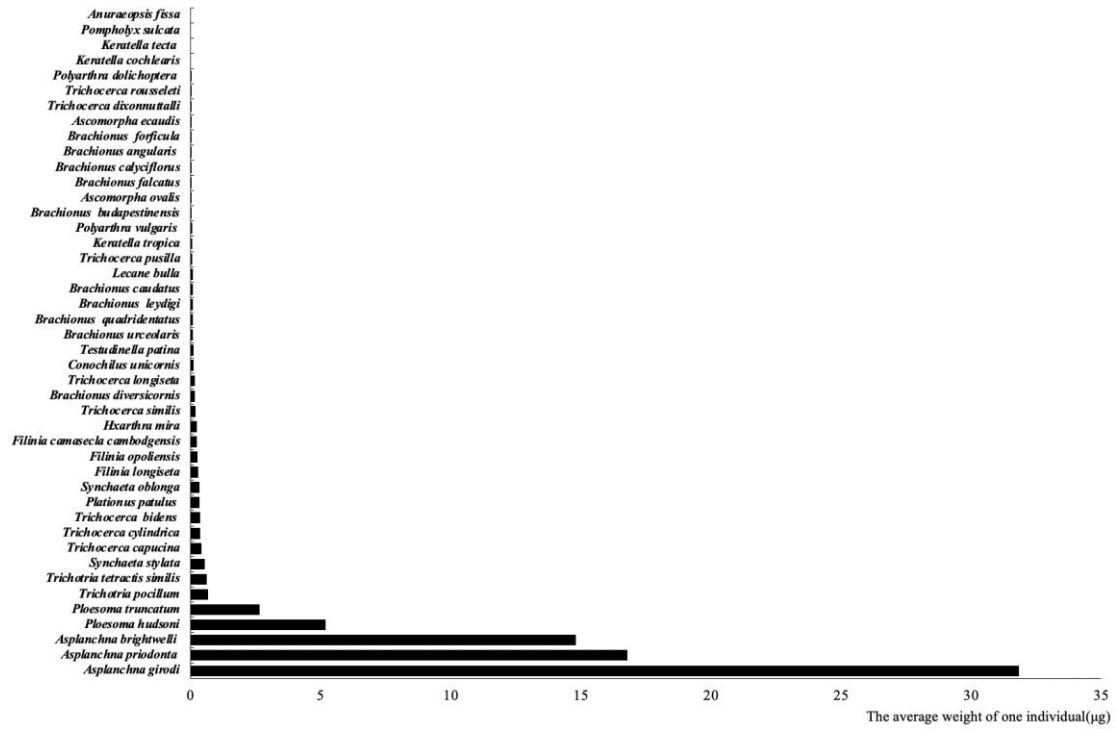

Figure S1. Average body weight of individual rotifers of 44 species.
